# Supplementary material for: Narrative Review: Nutrient Deficiencies in Adults and Children with Treated and Untreated Celiac Disease
Source: PubMed Central journal article supplement (PMC7071237; doi:10.3390/nu12020500), 2020-02-15
Supplement: nutrients-12-00500-s001.pdf [file nutrients-12-00500-s001.pdf]

## Supplementary Material:

**Table S1.** Overview of studies included in Tables 1 and 2, describing nutrient deficiencies in celiac disease patients with active and treated CD or nutrient intake in CD patients on a gluten-free diet.

| Paper                         | Study design                                         | Subjects                                                       | Number of subjects                                      | Age and demographics                                  | % female | Outcome parameters                                                                                                 | Description of tests and reference values used for biochemistry                                                                                                                                                                                                                                                                                                                                                                                        | Level of evidence (OCEBM 2009) |
|-------------------------------|------------------------------------------------------|----------------------------------------------------------------|---------------------------------------------------------|-------------------------------------------------------|----------|--------------------------------------------------------------------------------------------------------------------|--------------------------------------------------------------------------------------------------------------------------------------------------------------------------------------------------------------------------------------------------------------------------------------------------------------------------------------------------------------------------------------------------------------------------------------------------------|--------------------------------|
| Tikkakoski <i>et al.</i> 2007 | Prospective cohort study                             | Patients screened for CD                                       | 36 CD patients from 1900 adults screened for CD         | Adults (18-64 years);<br>in Finland                   | 73%      | Serum iron (median and number of patients with values below reference range of 9- 34 umol/l)                       | Test not described<br>Reference ranges:<br>9-34 umol/l for S-Fe, 4.5-34 nmol/l for folate                                                                                                                                                                                                                                                                                                                                                              | 2b                             |
| Harper <i>et al.</i> 2007     | Retrospective chart review                           | Adult CD patients<br>Reference cohort:<br>NHANES III           | 400                                                     | Mean age at diagnosis 46.5 years (SD 16.2);<br>USA    | 67%      | Hematologic blood values and biochemistry, Marsh grade                                                             | Not specified                                                                                                                                                                                                                                                                                                                                                                                                                                          | 2b                             |
| Vilppula <i>et al.</i> 2011   | Prospective cohort study                             | Elderly population from the GOAL cohort                        | New CD patients: 35, screen detected from 2815 subjects | Median age at diagnosis: 61 (range 52-76);<br>Finland | 57%      | Celiac serology and HLA typing, clinical symptoms, BMD, fracture history, BMI, hematologic values and biochemistry | Not specified                                                                                                                                                                                                                                                                                                                                                                                                                                          | 3b                             |
| Wierdsma <i>et al.</i> 2013   | Cross-sectional single center cohort study 2005–2012 | Consecutively diagnosed adult CD patients and healthy controls | CD: 80<br>Healthy controls: 24                          | (aged 18–75 years);<br>Netherlands                    | 65%      | Marsh grade, BMI, biochemistry                                                                                     | Test not described, reference values provided:<br>Vitamin A [1.2–3.0 nmol/L]; Vitamin B6 [13–80 nmol/L]; Folic acid [>5.6 nmol/L]; Vitamin B12 [150–700 pmol/L]; Zinc [11–19 nmol/L]; Vitamin (25-hydroxy) D [30–150 nmol/L]; Hemoglobin [M 8.5–11/F 7.5–10 mmol/L]; Ferritin [20–250 µG/L]                                                                                                                                                            | 3b                             |
| Zanini <i>et al.</i> 2013     | Retrospective single center cohort study 1990-2010   | Consecutively diagnosed CD patients                            | 1408                                                    | Adult CD patients;<br>Italy                           | 73%      | Demographics, anthropometrics, clinical manifestations, biochemistry, hematology, celiac serology, BMD             | Not specified                                                                                                                                                                                                                                                                                                                                                                                                                                          | 2b                             |
| Schosler <i>et al.</i> 2016   | Retrospective multicenter chart review 2008-2013     | CD patients                                                    | 93                                                      | >15 years ;<br>one county in Denmark                  | 76%      | GI symptoms, anthropometrics, biochemistry, and BMD                                                                | Test not described; Definition of abnormalities:<br>Anemia: hemoglobin <57.3 mmol/l (women) and <58.3 mmol/l (men); Folate deficiencies: folate < 9 nmol/l; PTH elevation: parathyrin >6.9 pmol/l; vitamin B12 deficiency: cobalamin <200 pmol/l; iron deficiency: ferritin < 22 mg/l; vitamin D deficiency: 25-hydroxy-vitamin D2+D3 < 50 nmol/l; elevated alkaline phosphatase: alkaline phosphatase > 105mmol/l; low ionized calcium: < 1.18mmol/l. | 2b                             |

|                                 |                                                                              |                                                                                                                                             |                                                                                   |                                                                                                                                                                                |                              |                                                                                                   |                                                                                                                                                                                                                                                                                                                                                                                                       |    |
|---------------------------------|------------------------------------------------------------------------------|---------------------------------------------------------------------------------------------------------------------------------------------|-----------------------------------------------------------------------------------|--------------------------------------------------------------------------------------------------------------------------------------------------------------------------------|------------------------------|---------------------------------------------------------------------------------------------------|-------------------------------------------------------------------------------------------------------------------------------------------------------------------------------------------------------------------------------------------------------------------------------------------------------------------------------------------------------------------------------------------------------|----|
| Sansotta <i>et al.</i> 2018     | Single center retrospective chart review 2002-2015                           | Pediatric and adult CD patients                                                                                                             | Children: 227<br>Adults: 327                                                      | Median (range)<br>Children: 8.5 years (1.28–17.89)<br>Adults: 38.9 years(18.3–75.7);<br><br>USA                                                                                | Children: 66%<br>Adults: 78% | GI and EI symptoms, prevalence of IDA                                                             | Not specified                                                                                                                                                                                                                                                                                                                                                                                         | 2b |
| Berry <i>et al.</i> 2018        | Single center prospective observational study 2012-2013                      | Consecutive patients, adult CD                                                                                                              | 103                                                                               | Age at presentation (baseline) 26.15 ± 13.3 years;<br><br>North India                                                                                                          | 53%                          | Clinical presentation, hematology, presence of anemia and folate, vitamin B12 and iron deficiency | Anemia: hemoglobin < 12 g/dL (females) and <13 g/dL (males) (WHO criteria);<br>Iron deficiency: serum ferritin <30 ng/mL, serum iron <30 µg/dL, total iron binding capacity > 400 µg/dL, and percentage saturation < 15%;<br>Folate deficiency: serum folate <4.0 ng/mL; vitamin B12 deficiency: serum B12 levels <200 pg/mL.<br>Serum folate and B12 levels measured using a competitive immunoassay | 1b |
| Haapalahti <i>et al.</i> 2005   | Retrospective cohort study                                                   | CD (clinical diagnosis and through screening) and controls from cohort of healthy school children studying risk factors for type 1 Diabetes | CD patients: 26<br>Healthy controls: 29                                           | 16 to 25 years;<br><br>Finland                                                                                                                                                 | 69%                          | Biochemistry, celiac serology, BMI                                                                | Used reference values of Oulu University Hospital; serum ferritin <25 mg/L in females and <20 mg/L in males, whole blood folate <85 nmol/L, serum pre-albumin <0.23 g/L in females and <0.24 g/L in males and serum vitamin B12-vitamin <180 pmol/L were considered as low concentrations.                                                                                                            | 2b |
| *Kempainen <i>et al.</i> 1998   | Single center, Prospective intervention study on use of oats in CD 1988-1990 | Adult CD patients, newly diagnosed                                                                                                          | New CD: 40                                                                        | Male:47 ± 12 (24–65)<br>Female ± 13 (18–62);<br><br>Finland                                                                                                                    | 70%                          | Marsh, energy intake, reported symptoms, food records, anthropometrics and biochemistry           | Methods measurement described for: Ferritin: immunoluminometric assay; Vitamin B12: radioisotope dilution assay; Zinc: atomic-absorption spectrophotometry<br>literature references for assays provided for vitamin D, E and A<br><br>no reference values provided                                                                                                                                    | 2b |
| Lerner <i>et al.</i> 2011       | Multi center cross sectional case control study                              | 5 groups: New Pediatric and adult CD patients, Pediatric patients with nonspecific abdominal pain and their parents (adult control group)   | Pediatric CD: 110<br>Adult CD: 22<br>Pediatric controls: 56<br>Adult controls: 84 | Pediatric CD: 6±4 years (Israel) and 4±4 years (Spain)<br>Pediatric controls 8±5 years<br>Adult controls: 39±8 years (Israel) and 44±13 years (Spain);<br><br>Israel and Spain | Children: 47 %<br>Adult: 35% | Serum vitamin D<br>Symptoms, familial disease, ethnicity, CD serology and biochemistry, histology | Measurement 25(OH) vitamin D serum concentration: commercial kit, LIAISON® 25(OH)D Assay (DiaSorin, Italy);<br>Deficiency defined as <20 ng/ml according to Saintonge et al (2009)                                                                                                                                                                                                                    | 3b |
| Chakravarthi <i>et al.</i> 2012 | Cross sectional cohort study 2008-2009                                       | Adult new CD                                                                                                                                | 54                                                                                | Mean ± SD age of 30.6 ± 9.3 years (range 18–50);                                                                                                                               | 56 %                         | BMD, biochemistry, CD serology, Marsh classification                                              | 25 (OH) vitamin D levels were estimated by radioimmunoassay (normal values are >20 ng/mL).                                                                                                                                                                                                                                                                                                            | 3b |

| India                                |                                                                                                                                        |                                                                    |                                                                               |                                                                                       |                          |                                                                                                                                                                    |                                                                                                                                                                                                                                                                                                                                                                                                                         |    |
|--------------------------------------|----------------------------------------------------------------------------------------------------------------------------------------|--------------------------------------------------------------------|-------------------------------------------------------------------------------|---------------------------------------------------------------------------------------|--------------------------|--------------------------------------------------------------------------------------------------------------------------------------------------------------------|-------------------------------------------------------------------------------------------------------------------------------------------------------------------------------------------------------------------------------------------------------------------------------------------------------------------------------------------------------------------------------------------------------------------------|----|
| Garcia-Manzanares <i>et al.</i> 2012 | Single center cross sectional study                                                                                                    | Adult-onset consecutive CD patients                                | 40                                                                            | 18 - 68 (mean 44.25 years);                                                           | 90%                      | CD serology, HLA type, Marsh classification, biochemistry and urine, WHO fracture risk assessed by FRAX tool, BMD                                                  | Not specified                                                                                                                                                                                                                                                                                                                                                                                                           | 3b |
| Spain                                |                                                                                                                                        |                                                                    |                                                                               |                                                                                       |                          |                                                                                                                                                                    |                                                                                                                                                                                                                                                                                                                                                                                                                         |    |
| Posthumus <i>et al.</i> 2017         | Retrospective single center cross-sectional study                                                                                      | Adult-onset CD                                                     | 283                                                                           | Mean age at diagnosis 39 ± 12 (range: 18–67) years;                                   | 78%                      | Biochemistry, Marsh classification, BMD                                                                                                                            | Not specified                                                                                                                                                                                                                                                                                                                                                                                                           | 2b |
| Netherlands                          |                                                                                                                                        |                                                                    |                                                                               |                                                                                       |                          |                                                                                                                                                                    |                                                                                                                                                                                                                                                                                                                                                                                                                         |    |
| *Kemppainen <i>et al.</i> 1999       | Prospective study 5 year follow-up 1990-1991                                                                                           | Adult new CD                                                       | 28                                                                            | Age (years)<br>Female: 44.1±13.6 (23.0–66.0)<br>Male: 48.6±12.3 (24.0–65.0);          | 68%                      | BMI, BMD, medication and supplement use, four day food record, calcium, vitamin D and PTH                                                                          | Serum 25-hydroxy vitamin D assay described by Törnquist and Lamberg-Allardt (1987)<br>At 5 year follow-up: serum 25(OH)D concentration measured by commercial radio immunoassay (Incstar, Stillwater, MN) (blood drawn in autumn)                                                                                                                                                                                       | 3b |
| Finland                              |                                                                                                                                        |                                                                    |                                                                               |                                                                                       |                          |                                                                                                                                                                    |                                                                                                                                                                                                                                                                                                                                                                                                                         |    |
| *McFarlane <i>et al.</i> 1995        | Single center cross sectional cohort 1991-1992                                                                                         | Adult-onset CD                                                     | 55                                                                            | Men: 50.2 years (range 27.0-65.0 years)<br>Women: 51-3 years (range 33.6-69.1 years); | 82%                      | Dietary assessment, BMI, biochemistry, BMD                                                                                                                         | Not specified                                                                                                                                                                                                                                                                                                                                                                                                           | 3b |
| United Kingdom                       |                                                                                                                                        |                                                                    |                                                                               |                                                                                       |                          |                                                                                                                                                                    |                                                                                                                                                                                                                                                                                                                                                                                                                         |    |
| Fernandez <i>et al.</i> 2010         | Retrospective chart review 1990-2008                                                                                                   | Adult-onset CD                                                     | 68                                                                            | Median age 36 years (range: 18-65);                                                   | 74%                      | Biochemistry, homocysteine levels, C677T mutation in methylene-tetrahydrofolate reductase (MTHFR) gene                                                             | Not specified                                                                                                                                                                                                                                                                                                                                                                                                           | 3b |
| Spain                                |                                                                                                                                        |                                                                    |                                                                               |                                                                                       |                          |                                                                                                                                                                    |                                                                                                                                                                                                                                                                                                                                                                                                                         |    |
| *Hallert <i>et al.</i> 2002          | Prospective multi-center cohort study 23% loss to follow up; compared to Nordic reference population and historic reference population | Adult CD 8–12 years of treatment with GFD; biopsy proven remission | 30;<br>Nordic reference population: 592<br>Historic reference population: 504 | Mean age 55 years; 95% confidence interval (CI), 53.2–56.8;                           | 60%                      | Biochemistry, plasma homocysteine, CD serology, 4-day food record, anthropometrics, Marsh classification, basal metabolic rate predicted using Schofield equations | Vitamin B-12: radioimmunoassay; plasma pyridoxal 5'-phosphate & total plasma homocysteine: enzymatic photometry with high-performance liquid chromatography separation (Mimelab AB, Söråker, Sweden)<br>Reference range:<br>Blood hemoglobin (g/L): 130–165 for males, 120–150 for females; Plasma ferritin (lg/L): 30–230 for males, 30–150 for females; Serum calcium (mmol/L): 2.2–2.6; Serum zinc (Imol/L): 11–17.7 | 2b |
| Sweden                               |                                                                                                                                        |                                                                    |                                                                               |                                                                                       |                          |                                                                                                                                                                    |                                                                                                                                                                                                                                                                                                                                                                                                                         |    |
| *Crofton <i>et al.</i> 1983          | Intervention study evaluating zinc absorption                                                                                          | Adult CD, newly diagnosed and on a GFD; Healthy controls           | CD: 22<br>Controls: 15                                                        | CD:<br>Untreated: 47 (range 16-78)<br>Treated: 38 (range 23-57)                       | CD: 68%<br>Controls: 20% | Plasma zinc concentrations, zinc tolerance test                                                                                                                    | Not specified                                                                                                                                                                                                                                                                                                                                                                                                           | 4  |

|                            |                                                                                                                                        |                                                       |                        |                                                                                                               |                         |                                                                                                      |                                                                                                                                                                                                                                                                                                                                  |  |    |
|----------------------------|----------------------------------------------------------------------------------------------------------------------------------------|-------------------------------------------------------|------------------------|---------------------------------------------------------------------------------------------------------------|-------------------------|------------------------------------------------------------------------------------------------------|----------------------------------------------------------------------------------------------------------------------------------------------------------------------------------------------------------------------------------------------------------------------------------------------------------------------------------|--|----|
|                            |                                                                                                                                        |                                                       |                        | 35 (range 25-50);                                                                                             |                         |                                                                                                      |                                                                                                                                                                                                                                                                                                                                  |  |    |
|                            |                                                                                                                                        |                                                       |                        | UK                                                                                                            |                         |                                                                                                      |                                                                                                                                                                                                                                                                                                                                  |  |    |
| *Boyd <i>et al.</i> 1985   | Single center retrospective cohort study 1969-1983                                                                                     | Adult and Pediatric consecutive CD patients           | 50                     | Range 13 to 71 years (median, 30 years);                                                                      | 68%                     | Presenting symptoms, anthropometrics, CD serology, test for malabsorption                            | Hemoglobin <12 g/dl; Folic acid <2.0 pg/l; Vitamin B12 <200 ng/l; Iron- men <16 pmol/l, women <11 pmol/l; calcium < 2.20 mmol/l; magnesium <0.70 mmol/l; zinc <8.4 pmol/l                                                                                                                                                        |  | 4  |
|                            |                                                                                                                                        |                                                       |                        | UK                                                                                                            |                         |                                                                                                      |                                                                                                                                                                                                                                                                                                                                  |  |    |
| Kuloglu <i>et al.</i> 2009 | Retrospective single center chart review 1998-2006                                                                                     | Pediatric CD                                          | 109                    | Mean age 8.81 ± 4.63 years;                                                                                   | 60%                     | Biochemistry, CD serology and autoantibodies, BMD, HLA genotype, BMI, anthropometrics,               | Not specified                                                                                                                                                                                                                                                                                                                    |  | 3b |
|                            |                                                                                                                                        |                                                       |                        | Turkey                                                                                                        |                         |                                                                                                      |                                                                                                                                                                                                                                                                                                                                  |  |    |
|                            |                                                                                                                                        |                                                       |                        |                                                                                                               |                         |                                                                                                      | Ferritin, folate, vitamin B12: electrochemiluminescence immunoassay using Roche Modular E170; Roche Diagnostics, Basel, Switzerland); Calcium: Roche Modular P800; Roche Diagnostics); vitamin D: electrochemiluminescence immunoassay using Roche Modular E170; Roche Diagnostics)                                              |  |    |
| Wessels <i>et al.</i> 2016 | Single center retrospective chart review; 2009-2014                                                                                    | Pediatric CD, newly diagnosed and on routine check up | 182                    | Mean age at diagnosis 6.3 years (±4.3) ;                                                                      | 65%                     | Biochemistry, Marsh grade, HLA genotype, CD serology                                                 | Reference values: Hemoglobin: age <7 y <6.9 mmol/L (<11.0 g/dL), age 7-15 y <6.5 mmol/L (<10.4 g/dL), age >15 y <6 mmol/L (<9.6 g/dL); Ferritin: age <5 y <12 ug/L , age ≥5 y <15 ug/L; Folate: <10 nmol/L (<4.45 ng/mL); Vitamin B12 <150 pmol/L (203 pg/mL); Calcium<2.15 mmol/L; Vitamin D (25[OH]D) <50 nmol/L (<20.8 ng/mL) |  | 2b |
|                            |                                                                                                                                        |                                                       |                        | Netherlands                                                                                                   |                         |                                                                                                      |                                                                                                                                                                                                                                                                                                                                  |  |    |
| Deora <i>et al.</i> 2017   | Single-center cohort study; at diagnosis, 6 and 18 months after starting a GFD, including patients receiving supplementation 2012-2016 | Consecutive pediatric CD patients (<17 years)         | 140                    | Mean age 7.8±4.01 years;                                                                                      | 62%                     | Biochemistry, CD serology, marsh grade, dietetic assessment of GFD                                   | Not specified                                                                                                                                                                                                                                                                                                                    |  | 4  |
|                            |                                                                                                                                        |                                                       |                        | Canada                                                                                                        |                         |                                                                                                      |                                                                                                                                                                                                                                                                                                                                  |  |    |
| Zanchi <i>et al.</i> 2008  | Prospective case-control study 2004-2005                                                                                               | Untreated pediatric CD patients and healthy children  | CD: 54<br>Controls: 60 | CD: mean age: 7.4 ± 4 years; range, 1.5 to 15 years<br>Controls: mean age: 8 ± 3 years; range, 2 to 16 years; | CD:59%<br>Controls: 58% | Biochemistry, CD serology, BMD, marsh grade                                                          | Calcium (normal values, 9.2 to 11 mg/dL), magnesium (1.80 to 2.30 mg/dL), 25(OH) vitamin D3 (20 to 120 ng/mL),                                                                                                                                                                                                                   |  | 1b |
|                            |                                                                                                                                        |                                                       |                        | Italy                                                                                                         |                         |                                                                                                      |                                                                                                                                                                                                                                                                                                                                  |  |    |
| Mager <i>et al.</i> 2012   | Single center prospective cohort                                                                                                       | Pediatric CD patients                                 | 43                     | At diagnosis 9.4±4.2 years (3 to 17);                                                                         | 64.8%                   | BMD, marsh grade, anthropometrics, vitamin D/K status, diet, physical activity and sunlight exposure | Performed in the Core Laboratory at the UA Hospital according to standard methodologies; serum 25(OH)-vitamin D:                                                                                                                                                                                                                 |  | 2b |

|                           |                                                                  |                                                                                                                                                                                         |                                                                  |                                                                                                                         |                                                |                                                                                      |                                                                                                                                                                                                                                                                |    |
|---------------------------|------------------------------------------------------------------|-----------------------------------------------------------------------------------------------------------------------------------------------------------------------------------------|------------------------------------------------------------------|-------------------------------------------------------------------------------------------------------------------------|------------------------------------------------|--------------------------------------------------------------------------------------|----------------------------------------------------------------------------------------------------------------------------------------------------------------------------------------------------------------------------------------------------------------|----|
|                           | Diagnosis and 1 year follow up (23% loss to follow-up) 2009-2010 |                                                                                                                                                                                         |                                                                  | Canada                                                                                                                  |                                                |                                                                                      | deficient <50 nmol/l, suboptimal 50–75 nmol/l, sufficient >75 nmol/l according to Holick et al., 2007; Calcium (mmol/l) 2.1–2.6; Magnesium (mmol/l) 0.7–1.0 mmol/l                                                                                             |    |
| Tokgöz <i>et al.</i> 2018 | Single center case control 2015-2016                             | Consecutive Pediatric CD patients; healthy controls                                                                                                                                     | CD: 52<br>Controls: 50                                           | Range 0-18 years<br>Median age CD: 9 ± 4.3 years for CD;<br>Median age controls: 8.7 ± 5.2 years;                       | CD: 52%<br>Controls: 50%                       | Vitamin D, K, E, A, CD serology, Marsh grade, anthropometrics, symptoms at diagnosis | Vitamin D: Chemiluminescence method in Architect hormone autoanalyzer (C8000 Architect, Abbott, Abbott Park, IL, USA).<br><br>vitamin D insufficiency < 30 ng/ml, vitamin D deficiency < 20 ng/ml                                                              | 2b |
| *Kavak <i>et al.</i> 2003 | Case control study 2000-2001                                     | Pediatric CD patients new and on a GFD; gender- and age matched healthy control subjects; None received supplements                                                                     | Untreated CD: 34<br>CD on 1 year GFD: 28<br>Matched controls: 64 | Turkey<br>New CD: mean age 7.6 ± 4.7 years (range, 2–15 years);<br>CD on GFD: mean 7.9 ± 4.7 years (range, 2–16 years); | New CD: 62%<br>CD on GFD: 57%<br>Controls: 47% | Biochemistry, BMD                                                                    | Serum calcium: normal, 8.8–10.8 mg/dL; 25 -hydroxy vitamin D (25-OHD3): normal 9–45 ng/mL, determined with radioimmunoassay (RIA kit, Diasorin Inc., Stillwater, MN), intra-assay coefficient 6.1%, inter-assay coefficient 7.1%                               | 4  |
| Tau <i>et al.</i> 2006    | Longitudinal and prospective study 1995-2001                     | Pediatric CD consecutive patients received 1000 IU vitamin D per day during first 3 months of GFD;<br><br>Compared to historic cohort of French children (Glastre <i>et al.</i> , 1990) | 24                                                               | Turkey<br>Mean age at diagnosis: 4.9 ± 74.30 years (range 1–11.7 years);                                                | 75%                                            | BMD, biochemistry                                                                    | Serum calcium atomic absorption spectrophotometry (normal value: 2.20–2.70 mmol/l); 25 hydroxy vitamin D in-house radiocompetitive protein-binding assay (Delvin <i>et al.</i> , 1980) normal values: 92.5722.5 nmol/l in summer and 62.57 25 nmol/l in winter | 3b |
| Volkan <i>et al.</i> 2018 | Prospective case-control study 2015-2016                         | Pediatric CD;<br>Age- and sex-matched healthy controls                                                                                                                                  | New CD: 26<br>CD on GFD: 46<br>Controls: 30                      | Argentina<br>Mean age CD: 11.69 ± 3.04<br>Controls: 12.27 ± 2.12;                                                       | Not specified                                  | BMD, vitamin D, K, CD serology                                                       | Not specified                                                                                                                                                                                                                                                  | 3b |
| Rawal <i>et al.</i> 2010  | Prospective RCT 2006-2007                                        | Consecutive Pediatric CD patients with and without zinc supplementation                                                                                                                 | 134                                                              | Turkey<br>Mean age 6.71 ± 3.45 years (range 2–14 years);                                                                | 38%                                            | Biochemistry, hematology, CD serology                                                | Plasma zinc measurement: atomic absorption spectrophotometer (PERKLIN ELMER 400)<br>Normal values (standardized in lab): 70–110 mgdl <sup>-1</sup>                                                                                                             | 1b |
| Rujner <i>et al.</i> 2004 | Single center cohort study                                       | Pediatric CD, new and on GFD<br>Healthy controls                                                                                                                                        | New CD: 28<br>On GFD: 41<br>Controls: 8                          | India<br>Female: mean age 13.04 years, range 5.92–18.3                                                                  | CD: 38%                                        | Presenting symptoms, Mg retention, serum, erythrocyte, and urine Mg                  | Tissue magnesium deficiency: magnesium retention > 40% of intravenous load;<br>Mg concentrations in serum, erythrocyte, and urine: flame atomic absorption spectrometry;                                                                                       | 2b |

|                                |                                                                                      |                                                                                                                                                                                                                 |                             | Male: mean age<br>12.3 years, range<br>5.9–16.7;<br><br>Poland                 |      | concentration, Mg dietary<br>intake                                                                                                                                                                    | Normal values Mg concentrations:<br>Mg serum (mmol/l)<br>(min–max) 0.7–1.04m, Mg erythrocyte (mmol/l) 1.8–<br>2.4, Mg in urinary excretion (mmol/24 h/1.73m <sup>2</sup> ) >2.0 |    |
|--------------------------------|--------------------------------------------------------------------------------------|-----------------------------------------------------------------------------------------------------------------------------------------------------------------------------------------------------------------|-----------------------------|--------------------------------------------------------------------------------|------|--------------------------------------------------------------------------------------------------------------------------------------------------------------------------------------------------------|---------------------------------------------------------------------------------------------------------------------------------------------------------------------------------|----|
| Wild <i>et al.</i><br>2010     | Prospective single-center<br>cohort study<br>2007-2008                               | Consecutive CD strict GFD<br>for 6 months or more;<br>2 control populations:<br>National Diet and<br>Nutrition Survey of Adults<br>(NDNS) Northern (n =<br>256)<br>UK Women’s Cohort<br>Study (UKWCS) (n = 708) | 93                          | Median age<br>(years)<br>Male: 63 (18–74)<br>Female: 53 (21–<br>79);<br><br>UK | 67%  | Nutrient intake (prospective<br>validated 5-day food diary),<br>CD serology, comorbidities,<br>reported dietary<br>supplementation                                                                     | EPIC validated food diary (Bingham <i>et al.</i> 2001)                                                                                                                          | 2b |
| Kinsey <i>et al.</i><br>2008   | Cross-sectional postal<br>survey,<br>CD diagnosis confirmed by<br>gastroenterologist | Adult CD<br>Reference population:<br>NDNS Henderson <i>et al.</i> ,<br>2002, 2003                                                                                                                               | 49                          | Mean age 58.6<br>(±17) years;<br><br>UK                                        | 76%  | Three-day food diary, food<br>questionnaire; Calculated<br>mean daily intake of macro<br>and micronutrients                                                                                            | Not specified                                                                                                                                                                   | 3b |
| Shepherd <i>et al.</i><br>2013 | Prospective cohort study                                                             | New CD and, CD on a GFD                                                                                                                                                                                         | New CD: 50<br>CD on GFD: 55 | Median age 44<br>(range 18–71)<br>years;<br><br>Australia                      | 76%  | Hematology, biochemistry,<br>Marsh grade, seven-day<br>prospective food record,<br>structured interview:<br>symptoms, demographics,<br>anthropometry, previous<br>dietary patterns, medical<br>details | Detailed protocol, Measuring cups, spoons and<br>reference diagrams provided                                                                                                    | 2b |
| Thompson <i>et al.</i><br>2005 | Cross sectional survey<br>study                                                      | Adult CD patients                                                                                                                                                                                               | 47                          | Mean age 51<br>years (SD:11)<br>range 21-73<br>years;<br><br>USA               | 83%  | Three-day estimated self-<br>reported food records                                                                                                                                                     | Not applicable                                                                                                                                                                  | 4  |
| Mijatov <i>et al.</i><br>2016  | Prospective cohort study                                                             | Women with CD on strict<br>GFD                                                                                                                                                                                  | 40                          | Mean age in<br>years 66.4 (range<br>41-109);<br><br>Slovenia                   | 100% | Three-day food diary; Resting<br>metabolic rate, physical<br>activity level                                                                                                                            | Not applicable                                                                                                                                                                  | 3b |
| *Grehn <i>et al.</i><br>2001   | Cross sectional cohort<br>study<br>1996-1997                                         | Adult CD patients on GFD<br>Reference population:<br>Swedish national<br>dietary survey in 1989,<br>Becker <i>et al.</i>                                                                                        | 49                          | 45-64 years;<br><br>Sweden                                                     | 65%  | 4-day food record,<br>biochemistry                                                                                                                                                                     | Blood samples analyzed according to local routines,<br>except for zinc: atomic-absorption<br>spectrophotometry                                                                  | 3b |
| *Collins <i>et al.</i><br>1986 | Single center cross<br>sectional cohort                                              | Adult CD patients                                                                                                                                                                                               | 18                          | Mean age 44<br>years (range 18-<br>59);<br><br>UK                              | 50%  | Anthropometrics, symptoms,<br>dietary history assessed by<br>dietician                                                                                                                                 | Not applicable                                                                                                                                                                  | 4  |

|                               |                                                                             |                                                                     |                                       |                                                                                     |                              |                                                                                                                          |                                                                                                                                                                                                                                                                                                                                                     |    |
|-------------------------------|-----------------------------------------------------------------------------|---------------------------------------------------------------------|---------------------------------------|-------------------------------------------------------------------------------------|------------------------------|--------------------------------------------------------------------------------------------------------------------------|-----------------------------------------------------------------------------------------------------------------------------------------------------------------------------------------------------------------------------------------------------------------------------------------------------------------------------------------------------|----|
| Pham-Short <i>et al.</i> 2017 | Case-control study                                                          | Pediatric CD and Type I diabetes                                    | T1D+CD: 10<br>Type I diabetes only: 7 | Children<br>Type I diabetes+<br>CD: 14.3 ± 3.6<br>Type I diabetes only: 14.7 ± 2.8; | -                            | Continuous glucose monitoring; Standardized weighed food diary for three days                                            | Food diaries analyzed using Foodworks 7 (Xyris, Australia), which uses Food Standards Australia New Zealand (FSANZ) published AusNut and NUTTAB 2010 databases                                                                                                                                                                                      | 3b |
|                               |                                                                             |                                                                     |                                       | Australia                                                                           |                              |                                                                                                                          |                                                                                                                                                                                                                                                                                                                                                     |    |
| Valente <i>et al.</i> 2015    | Cross-sectional single-blind study 2011-2012                                | CD                                                                  | CD: 20<br>Healthy controls: 39        | Adults 36.3 ± 13.7 years;<br><br>Brazil                                             | 65 %                         | 3-day food records, serum concentrations of homocysteine, vitamin B6, B12, and folate determined after overnight fasting | Homocysteine (Immulin2000, Siemens, USA), vitamin B12, and serum folate (Modular e170, Roche, Switzerland) by chemiluminescence, vitamin B6 determined through analysis of PLP, isomer of highest concentration in human plasma, through High-Performance Liquid Chromatography with fluorescence detection Kimura et al 1996, Deitrick et al. 2001 | 3b |
| *Bottaro <i>et al.</i> 1999   | Multicenter (42 participating centers) retrospective cohort study 1990-1994 | Adult and Pediatric consecutive patients with silent/subclinical CD | 1026 (644 children, 382 adults)       | Mean age:<br>Children: 7.7 ± 4.2<br>Adults: 24.4 ± 12.5;                            | Children: 77%<br>Adults: 71% | Medical history, comorbidities, demographics, symptoms, hematology, CD serology                                          | Not specified                                                                                                                                                                                                                                                                                                                                       | 3b |
|                               |                                                                             |                                                                     |                                       | Italy                                                                               |                              |                                                                                                                          |                                                                                                                                                                                                                                                                                                                                                     |    |
| Öhlund <i>et al.</i> 2010     | Baseline values of a prospective probiotics intervention study 2004         | Pediatric CD patients on GFD                                        | 25                                    | 4-17 years;<br><br>Sweden                                                           | 72%                          | 5-day food records, anthropometrics,                                                                                     | Use of household measures for quantities; Individual energy requirement calculated according to Nordic Nutrition Recommendations 2004 (NNR-04)                                                                                                                                                                                                      | 3b |

Overview of studies included in Tables 1 and 2 of the review reporting on nutrient deficiencies and dietary nutrient intake at diagnosis and on a gluten-free diet. \* Studies that did not meet the quality criteria were only included if no other eligible article existed for the nutrient and are marked by an asterisk. Evidence was assessed using the 2009 Oxford Centre for Evidence-Based Medicine Levels of evidence, where level of evidence could be graded down based on quality and if the study did not match the research question of this review.

Abbreviations: celiac disease (CD), gluten-free diet (GFD), Oxford Centre for Evidence-Based Medicine (OCEBM), serum iron (S-Fe), National Health and Nutrition Examination Survey (NHANES), United States of America (USA), Good Ageing in the Lahti region (GOAL cohort), human leukocyte antigen (HLA), bone mineral density (BMD), body mass index (BMI), Gastrointestinal symptoms (GI symptoms), parathyroid hormone (PTH), Extra intestinal symptoms (EI symptoms), iron deficiency anemia (IDA), world health organization (WHO), WHO fracture risk assessment tool (FRAX tool), United Kingdom (UK), Magnesium (Mg), National Diet and Nutrition Survey of Adults (NDNS), UK Women's Cohort Study (UKWCS), European Prospective Investigation of Cancer study (EPIC study), C-reactive protein (CRP), Nordic Nutrition Recommendations (NNR).
